# Supplementary material
Source: MDPI journal article supplement (https://www.mdpi.com/1424-2818/15/7/807)
Supplement: s1 [file s1]

## Supplementary material – File S1

### Community Richness and Diversity of Endophytic Fungi Associated with the Orchid *Guarianthe skinneri* Infested with “Black Blotch” in the Soconusco Region, Chiapas, Mexico

F. Hernández-Ramírez, A. Damon, S. P. Fernández-Pavía, K. Guillén-Navarro, L. Iracheta-Donjuan, E. Zarza and R. Castro-Chan

Table S1. Sample ID, barcode, plant number, condition, tissue, sample, number of raw sequences, number of filtered sequences, number of sequences without chimeras. The samples correspond to leaves (L), pseudobulbs (P) and roots (R) of five (1-5) asymptomatic plants (AP) and five (6-10) symptomatic plants (SP) of *Guarianthe skinneri*.

| SampleID | Barcode  | Plant | Condition | Tissue | Sample  | Raw sequences | Dada-ITSxpress | Dada-ITSx-UCHIME |
|----------|----------|-------|-----------|--------|---------|---------------|----------------|------------------|
| T4.R1    | ATCGATGC | 1     | AP        | L      | 1-AP-L  | 215758        | 65453          | 59969            |
| T4.R2    | ATCGCCAA | 2     | AP        | L      | 2-AP-L  | 538225        | 123752         | 119845           |
| T4.R3    | ATCGCCTT | 3     | AP        | L      | 3-AP-L  | 213764        | 68544          | 65410            |
| T4.R4    | ATCGCGAT | 4     | AP        | L      | 4-AP-L  | 269370        | 62528          | 62346            |
| T4.R5    | ATCGCGTA | 5     | AP        | L      | 5-AP-L  | 151471        | 110646         | 110288           |
| T5.R1    | ATCGGCAT | 1     | AP        | P      | 1-AP-P  | 330069        | 116802         | 106055           |
| T5.R2    | ATCGGCTA | 2     | AP        | P      | 2-AP-P  | 393540        | 109719         | 106447           |
| T5.R3    | ATCGTACG | 3     | AP        | P      | 3-AP-P  | 298451        | 78061          | 67188            |
| T5.R4    | ATCGTAGC | 4     | AP        | P      | 4-AP-P  | 462846        | 127246         | 108754           |
| T5.R5    | ATCGTTCC | 5     | AP        | P      | 5-AP-P  | 424253        | 98466          | 93898            |
| T6.R1    | ATCGTTGG | 1     | AP        | R      | 1-AP-R  | 439851        | 113361         | 108528           |
| T6.R2    | ATGCAACC | 2     | AP        | R      | 2-AP-R  | 444652        | 123270         | 120874           |
| T6.R3    | ATGCAAGG | 3     | AP        | R      | 3-AP-R  | 330528        | 63125          | 60504            |
| T6.R4    | ATGCATCG | 4     | AP        | R      | 4-AP-R  | 281130        | 142881         | 139537           |
| T6.R5    | ATGCATGC | 5     | AP        | R      | 5-AP-R  | 663244        | 164519         | 160632           |
| T10.R1   | ATGCCGAT | 6     | SP        | L      | 6-SP-L  | 469070        | 63394          | 59103            |
| T10.R2   | ATGCCGTA | 7     | SP        | L      | 7-SP-L  | 313260        | 83043          | 82702            |
| T10.R3   | ATGCGCAT | 8     | SP        | L      | 8- SP-L | 377838        | 80204          | 77666            |

|        |          |    |    |   |          |        |        |        |
|--------|----------|----|----|---|----------|--------|--------|--------|
| T10.R4 | ATGCGCTA | 9  | SP | L | 9- SP-L  | 717045 | 237646 | 236501 |
| T10.R5 | ATGCGGAA | 10 | SP | L | 10-SP-L  | 484045 | 91548  | 88882  |
| T11.R1 | ATGCGGTT | 6  | SP | P | 6- SP-P  | 301400 | 56875  | 52475  |
| T11.R2 | ATGCTACG | 7  | SP | P | 7- SP-P  | 579654 | 63218  | 62069  |
| T11.R3 | ATGCTAGC | 8  | SP | P | 8- SP-P  | 554395 | 154851 | 153397 |
| T11.R4 | ATGCTTCC | 9  | SP | P | 9- SP-P  | 579339 | 102917 | 95973  |
| T11.R5 | ATGCTTGG | 10 | SP | P | 10- SP-P | 512337 | 139075 | 136506 |
| T12.R1 | ATGGAACG | 6  | SP | R | 6- SP-R  | 408895 | 10463  | 9346   |
| T12.R2 | ATGGAAGC | 7  | SP | R | 7- SP-R  | 762220 | 138784 | 131957 |
| T12.R3 | ATGGATCC | 8  | SP | R | 8- SP-R  | 316132 | 20515  | 18077  |
| T12.R4 | ATGGATGG | 9  | SP | R | 9- SP-R  | 656609 | 170886 | 166532 |
| T12.R5 | ATGGCCAT | 10 | SP | R | 10-SP-R  | 757706 | 175860 | 172269 |

Table S2. Taxonomy of the composition of the fungal community. The samples correspond to leaves (L), pseudobulbs (P) and roots (R) of five (1-5) asymptomatic plants (AP) and five (6-10) symptomatic plants (SP) of *Guarianthe skinneri*.

| Sample   | Phylum | Class | Order | Family | Genus | Species |
|----------|--------|-------|-------|--------|-------|---------|
| 1-AP-L   |        | 2     | 6     | 22     | 32    | 32      |
| 2-AP-L   |        | 2     | 7     | 17     | 19    | 20      |
| 3-AP-L   |        | 2     | 7     | 21     | 25    | 33      |
| 4-AP-L   |        | 2     | 6     | 15     | 19    | 17      |
| 5-AP-L   |        | 2     | 6     | 18     | 19    | 19      |
| 1-AP-P   |        | 2     | 6     | 20     | 28    | 28      |
| 2-AP-P   |        | 3     | 7     | 20     | 27    | 26      |
| 3-AP-P   |        | 2     | 11    | 27     | 32    | 35      |
| 4-AP-P   |        | 3     | 11    | 30     | 44    | 51      |
| 5-AP-P   |        | 3     | 6     | 27     | 40    | 43      |
| 1-AP-R   |        | 2     | 8     | 26     | 44    | 53      |
| 2-AP-R   |        | 2     | 7     | 24     | 27    | 34      |
| 3-AP-R   |        | 3     | 7     | 24     | 35    | 36      |
| 4-AP-R   |        | 2     | 10    | 22     | 28    | 27      |
| 5-AP-R   |        | 3     | 10    | 30     | 32    | 35      |
| 6-SP-L   |        | 2     | 7     | 21     | 25    | 27      |
| 7-SP-L   |        | 2     | 6     | 18     | 21    | 24      |
| 8- SP-L  |        | 2     | 6     | 23     | 28    | 32      |
| 9- SP-L  |        | 2     | 8     | 19     | 20    | 21      |
| 10- SP-L |        | 5     | 17    | 45     | 57    | 76      |
| 6- SP-P  |        | 2     | 7     | 21     | 25    | 23      |

|          |   |    |    |     |     |     |
|----------|---|----|----|-----|-----|-----|
| 7- SP-P  | 3 | 7  | 26 | 37  | 42  | 40  |
| 8- SP-P  | 2 | 12 | 34 | 39  | 44  | 34  |
| 9- SP-P  | 2 | 6  | 18 | 20  | 21  | 22  |
| 10- SP-P | 2 | 7  | 25 | 35  | 43  | 35  |
| 6- SP-R  | 3 | 9  | 27 | 35  | 35  | 20  |
| 7- SP-R  | 2 | 11 | 32 | 44  | 51  | 42  |
| 8- SP-R  | 2 | 7  | 20 | 25  | 24  | 17  |
| 9- SP-R  | 4 | 13 | 37 | 44  | 49  | 39  |
| 10- SP-R | 3 | 9  | 30 | 45  | 48  | 35  |
| Total    | 5 | 28 | 70 | 156 | 234 | 164 |

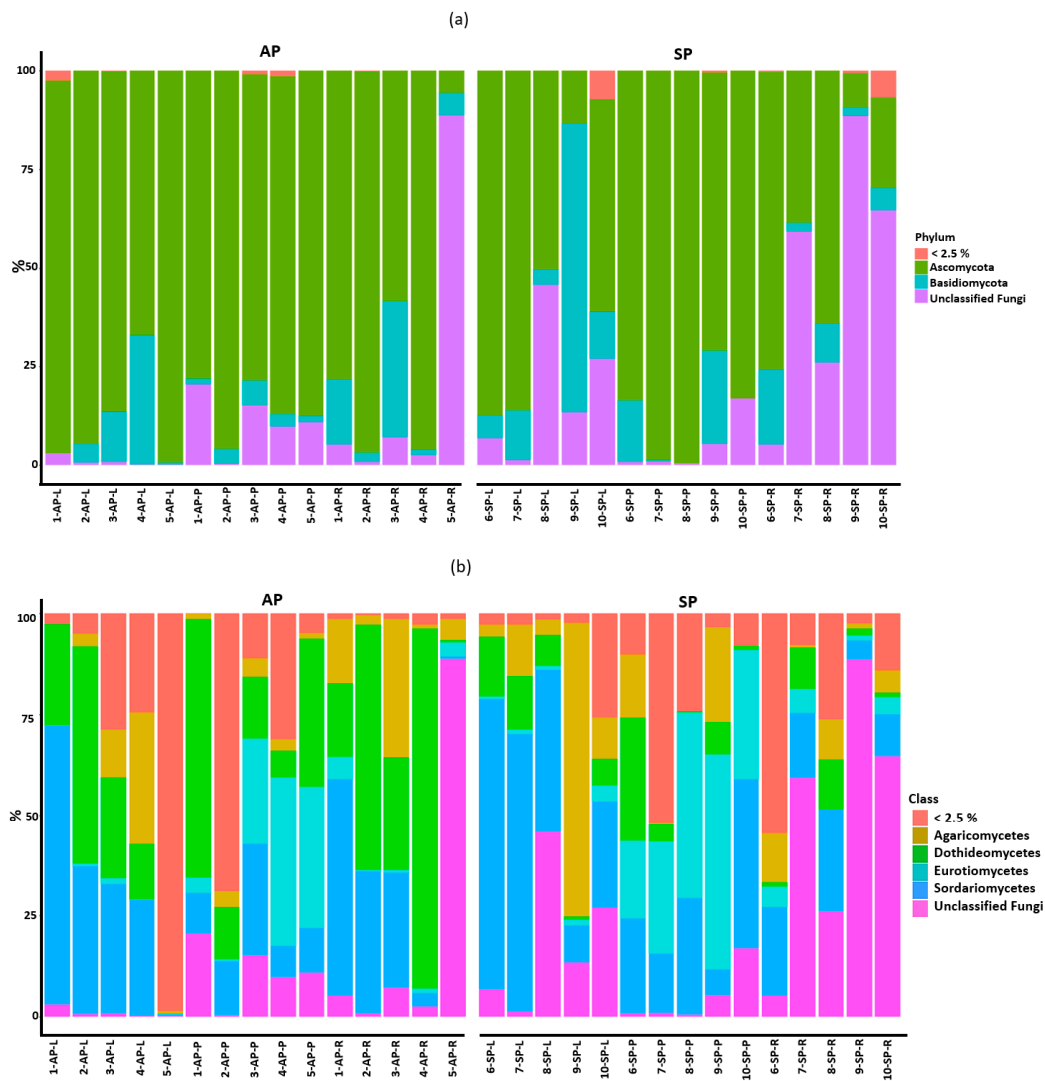

Figure S1. Relative frequency of Phylum (a) and Class (b) assigned to endophytic fungi associated with *Guarianthe skinneri* asymptomatic and symptomatic plants. The samples correspond to the leaves (L), pseudobulbs (P) and roots (R) of five (1-5) asymptomatic plants (AP) and five (6-10) symptomatic plants (SP).

Table S3. PERMANOVA analysis. The samples correspond to leaves (L), pseudobulbs (P) and roots (R) of symptomatic and asymptomatic plants of *Guarianthe skinneri*.

| Method name            | PERMANOVA |         |         |
|------------------------|-----------|---------|---------|
| Test statistic name    | Pseudo-F  |         |         |
| Group                  | L vs P    | L vs R  | P vs R  |
| Simple size            | 20        | 19      | 19      |
| Number of groups       | 2         | 2       | 2       |
| Test statistic         | 1.62578   | 1.54544 | 1.11884 |
| p-value                | 0.001     | 0.001   | 0.079   |
| q-value                | 0.0015    | 0.0015  | 0.079   |
| Number of permutations | 999       | 999     | 999     |

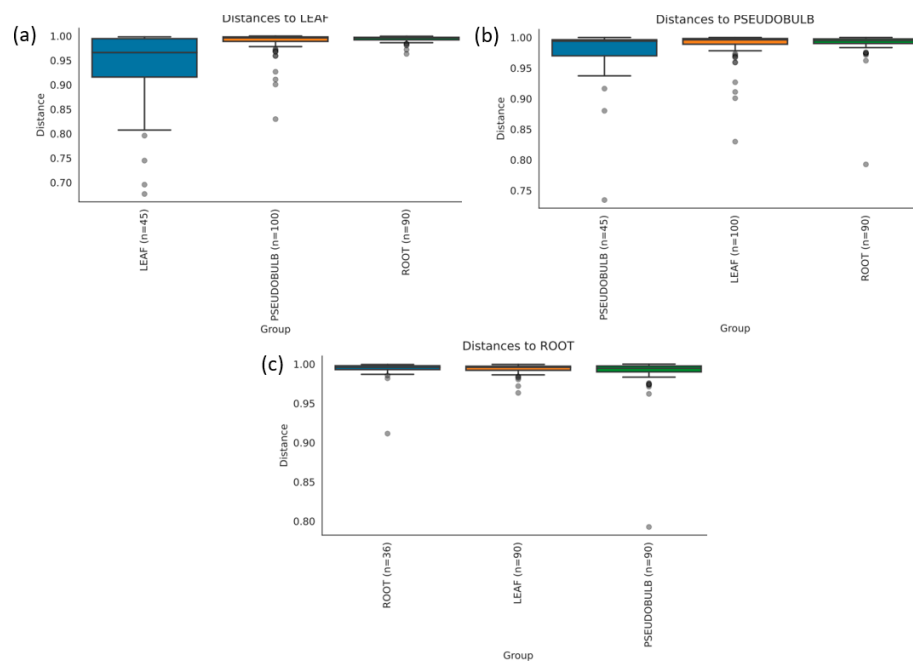

Figure S2. Associations by tissue using Bray-Curtis distances, calculated with Qiime2, based on the data set including all taxa detected in leaves (a), pseudobulbs (b) and roots (c) of symptomatic and asymptomatic plants of *Guarianthe skinneri*.

Table S4. PERMANOVA analysis of asymptomatic plants of *Guarianthe skinneri*. The samples correspond to leaves (L), pseudobulbs (P) and roots (R).

| Method name            |        | PERMANOVA |        |
|------------------------|--------|-----------|--------|
| Test statistic name    |        | Pseudo-F  |        |
| Group                  | L vs P | L vs R    | P vs R |
| Simple size            | 10     | 10        | 10     |
| Number of groups       | 2      | 2         | 2      |
| Test statistic         | 1.52   | 1.36      | 1.08   |
| p-value                | 0.005  | 0.097     | 0.105  |
| q-value                | 0.015  | 0.015     | 0.015  |
| Number of permutations | 999    | 999       | 999    |

Table S5. PERMANOVA analysis of symptomatic plants of *Guarianthe skinneri*. The samples correspond to leaves (L), pseudobulbs (P) and roots (R).

| Method name            |        | PERMANOVA |        |
|------------------------|--------|-----------|--------|
| Test statistic name    |        | Pseudo-F  |        |
| Group                  | L vs P | L vs R    | P vs R |
| Simple size            | 10     | 9         | 9      |
| Number of groups       | 2      | 2         | 2      |
| Test statistic         | 1.35   | 1.34      | 1.28   |
| p-value                | 0.02   | 0.01      | 0.02   |
| q-value                | 0.02   | 0.02      | 0.02   |
| Number of permutations | 999    | 999       | 999    |

Table S8. Total occurrence of ASVs associated with *Guarianthe skinneri*, classified by Trophic Mode and Guild. Bold type corresponds to guild labeled with endophyte type.

| Trophic Mode          | Total ASVs | Percentage % | Guild                                                                | ASVs | Percentage % |
|-----------------------|------------|--------------|----------------------------------------------------------------------|------|--------------|
| Saprotroph            | 304        | 16.37        | Undefined Saprotroph                                                 | 244  | 13.1         |
|                       |            |              | Wood Saprotroph                                                      | 26   | 1.4          |
|                       |            |              | Soil Saprotroph                                                      | 10   | 0.5          |
|                       |            |              | Plant Pathogen-Undefined Saprotroph                                  | 6    | 0.3          |
|                       |            |              | Dung Saprotroph                                                      | 4    | 0.2          |
|                       |            |              | Dung Saprotroph-Plant Saprotroph-Wood Saprotroph                     | 4    | 0.2          |
|                       |            |              | Dung Saprotroph-Undefined Saprotroph-Wood Saprotroph                 | 4    | 0.2          |
|                       |            |              | Dung Saprotroph-Wood Saprotroph                                      | 2    | 0.1          |
|                       |            |              | Litter Saprotroph-Soil Saprotroph-Wood Saprotroph                    | 2    | 0.1          |
|                       |            |              | Litter Saprotroph                                                    | 1    | 0.1          |
|                       |            |              | Plant Saprotroph-Wood Saprotroph                                     | 1    | 0.1          |
| Pathotroph-Saprotroph | 170        | 9.15         | Animal Pathogen-Undefined Saprotroph                                 | 39   | 2.1          |
|                       |            |              | Animal Pathogen-Plant Pathogen-Undefined Saprotroph                  | 36   | 1.9          |
|                       |            |              | Plant Pathogen-Undefined Saprotroph                                  | 28   | 1.5          |
|                       |            |              | <b>Endophyte-Plant Pathogen-Wood Saprotroph</b>                      | 22   | 1.2          |
|                       |            |              | Animal Pathogen-Fungal Parasite-Undefined Saprotroph                 | 18   | 1.0          |
|                       |            |              | Plant Pathogen-Wood Saprotroph                                       | 14   | 0.8          |
|                       |            |              | Plant Pathogen                                                       | 8    | 0.4          |
|                       |            |              | <b>Endophyte-Lichen Parasite-Plant Pathogen-Undefined Saprotroph</b> | 2    | 0.1          |

|                                           |     |      |                                                                                                                                                                                                                                                                                                                                                                                                                                                                                                                                                                                                                                                                                                                                                                                                                                                                                                                                                                                             |    |     |
|-------------------------------------------|-----|------|---------------------------------------------------------------------------------------------------------------------------------------------------------------------------------------------------------------------------------------------------------------------------------------------------------------------------------------------------------------------------------------------------------------------------------------------------------------------------------------------------------------------------------------------------------------------------------------------------------------------------------------------------------------------------------------------------------------------------------------------------------------------------------------------------------------------------------------------------------------------------------------------------------------------------------------------------------------------------------------------|----|-----|
|                                           |     |      | Fungal Parasite-Plant<br>Pathogen-Plant Saprotroph                                                                                                                                                                                                                                                                                                                                                                                                                                                                                                                                                                                                                                                                                                                                                                                                                                                                                                                                          | 2  | 0.1 |
| Pathotroph-<br>Saprotroph-<br>Symbiotroph | 168 | 9.05 | Animal Pathogen-<br>Endophyte-Fungal<br>Parasite-Lichen Parasite-<br>Plant Pathogen-Wood<br>Saprotroph<br>Animal Pathogen-<br>Endophyte-Lichen<br>Parasite-Plant Pathogen-<br>Soil Saprotroph-Wood<br>Saprotroph<br>Animal Pathogen-<br>Endophyte-Endosymbiont-<br>Epiphyte-Soil Saprotroph-<br>Undefined Saprotroph<br>Dung Saprotroph-<br>Endophyte-Plant<br>Pathogen-Undefined<br>Saprotroph<br>Animal Pathogen-<br>Endophyte-Fungal<br>Parasite-Plant Pathogen-<br>Wood Saprotroph<br>Endophyte-Lichen<br>Parasite-Plant Pathogen-<br>Undefined Saprotroph<br>Animal Pathogen-Dung<br>Saprotroph-Endophyte-<br>Lichen Parasite-Plant<br>Pathogen-Undefined<br>Saprotroph<br>Animal Pathogen-<br>Endophyte-Epiphyte-Plant<br>Pathogen-Undefined<br>Saprotroph<br>Animal Pathogen-<br>Endophyte-Plant<br>Pathogen-Wood<br>Saprotroph<br>Endophyte-Plant<br>Pathogen-Wood<br>Saprotroph<br>Animal Pathogen-<br>Endophyte-Epiphyte-<br>Fungal Parasite-Plant<br>Pathogen-Wood<br>Saprotroph | 47 | 2.5 |
|                                           |     |      |                                                                                                                                                                                                                                                                                                                                                                                                                                                                                                                                                                                                                                                                                                                                                                                                                                                                                                                                                                                             | 30 | 1.6 |
|                                           |     |      |                                                                                                                                                                                                                                                                                                                                                                                                                                                                                                                                                                                                                                                                                                                                                                                                                                                                                                                                                                                             | 23 | 1.2 |
|                                           |     |      |                                                                                                                                                                                                                                                                                                                                                                                                                                                                                                                                                                                                                                                                                                                                                                                                                                                                                                                                                                                             | 21 | 1.1 |
|                                           |     |      |                                                                                                                                                                                                                                                                                                                                                                                                                                                                                                                                                                                                                                                                                                                                                                                                                                                                                                                                                                                             | 11 | 0.6 |
|                                           |     |      |                                                                                                                                                                                                                                                                                                                                                                                                                                                                                                                                                                                                                                                                                                                                                                                                                                                                                                                                                                                             | 5  | 0.3 |
|                                           |     |      |                                                                                                                                                                                                                                                                                                                                                                                                                                                                                                                                                                                                                                                                                                                                                                                                                                                                                                                                                                                             | 5  | 0.3 |
|                                           |     |      |                                                                                                                                                                                                                                                                                                                                                                                                                                                                                                                                                                                                                                                                                                                                                                                                                                                                                                                                                                                             | 4  | 0.2 |
|                                           |     |      |                                                                                                                                                                                                                                                                                                                                                                                                                                                                                                                                                                                                                                                                                                                                                                                                                                                                                                                                                                                             | 3  | 0.2 |
|                                           |     |      |                                                                                                                                                                                                                                                                                                                                                                                                                                                                                                                                                                                                                                                                                                                                                                                                                                                                                                                                                                                             | 3  | 0.2 |
|                                           |     |      |                                                                                                                                                                                                                                                                                                                                                                                                                                                                                                                                                                                                                                                                                                                                                                                                                                                                                                                                                                                             | 2  | 0.1 |

|                        |     |      |                                  |     |     |
|------------------------|-----|------|----------------------------------|-----|-----|
|                        |     |      | Bryophyte Parasite-Dung          | 2   | 0.1 |
|                        |     |      | Saprotroph-                      |     |     |
|                        |     |      | Ectomycorrhizal-Fungal           |     |     |
|                        |     |      | Parasite-Leaf Saprotroph-        |     |     |
|                        |     |      | Plant Parasite-Undefined         |     |     |
|                        |     |      | Saprotroph-Wood                  |     |     |
|                        |     |      | Saprotroph                       |     |     |
|                        |     |      | <b>Animal Pathogen-</b>          | 2   | 0.1 |
|                        |     |      | <b>Endophyte-Ericoid</b>         |     |     |
|                        |     |      | <b>Mycorrhizal-Plant</b>         |     |     |
|                        |     |      | <b>Pathogen-Wood</b>             |     |     |
|                        |     |      | <b>Saprotroph</b>                |     |     |
|                        |     |      | <b>Endophyte-Lichen</b>          | 2   | 0.1 |
|                        |     |      | <b>Parasite-Undefined</b>        |     |     |
|                        |     |      | <b>Saprotroph</b>                |     |     |
|                        |     |      | <b>Endophyte-Plant</b>           | 2   | 0.1 |
|                        |     |      | <b>Pathogen-Plant Saprotroph</b> |     |     |
|                        |     |      | <b>Animal Pathogen-</b>          | 1   | 0.1 |
|                        |     |      | <b>Endophyte-Epiphyte-</b>       |     |     |
|                        |     |      | <b>Undefined Saprotroph</b>      |     |     |
|                        |     |      | Animal Pathogen-Soil             | 1   | 0.1 |
|                        |     |      | Saprotroph                       |     |     |
|                        |     |      | Animal Endosymbiont-             | 1   | 0.1 |
|                        |     |      | Animal Pathogen-Plant            |     |     |
|                        |     |      | Pathogen-Undefined               |     |     |
|                        |     |      | Saprotroph                       |     |     |
|                        |     |      | <b>Ectomycorrhizal-</b>          | 1   | 0.1 |
|                        |     |      | <b>Endophyte-Plant</b>           |     |     |
|                        |     |      | <b>Pathogen-Wood</b>             |     |     |
|                        |     |      | <b>Saprotroph</b>                |     |     |
|                        |     |      | Endomycorrhizal-Plant            | 1   | 0.1 |
|                        |     |      | Pathogen-Undefined               |     |     |
|                        |     |      | Saprotroph                       |     |     |
|                        |     |      | <b>Endophyte-Fungal</b>          | 1   | 0.1 |
|                        |     |      | <b>Parasite-Lichen Parasite-</b> |     |     |
|                        |     |      | <b>Plant Pathogen-Wood</b>       |     |     |
|                        |     |      | <b>Saprotroph</b>                |     |     |
| Pathotroph-Symbiotroph | 117 | 6.30 | <b>Endophyte-Plant Pathogen</b>  | 112 | 6.0 |
|                        |     |      | <b>Endophyte-Epiphyte-</b>       | 3   | 0.2 |
|                        |     |      | <b>Fungal Parasite-Insect</b>    |     |     |
|                        |     |      | <b>Parasite</b>                  |     |     |
|                        |     |      | Animal Pathogen-Animal           | 2   | 0.1 |
|                        |     |      | Endosymbiont                     |     |     |
| Pathotroph             | 104 | 5.60 | Plant Pathogen                   | 94  | 5.1 |
|                        |     |      | Animal Pathogen                  | 5   | 0.3 |
|                        |     |      | Fungal Parasite                  | 4   | 0.2 |



|                            |     |      |                                                                                                                                                                                                                                                                                                                                                                 |     |      |
|----------------------------|-----|------|-----------------------------------------------------------------------------------------------------------------------------------------------------------------------------------------------------------------------------------------------------------------------------------------------------------------------------------------------------------------|-----|------|
|                            |     |      | Litter Saprotroph-Plant<br>Pathogen                                                                                                                                                                                                                                                                                                                             | 1   | 0.1  |
| Saprotroph-<br>Symbiotroph | 67  | 3.61 | <b>Endophyte-Undefined<br/>Saprotroph-Wood<br/>Saprotroph<br/>Endophyte-Litter<br/>Saprotroph-Soil<br/>Saprotroph-Undefined<br/>Saprotroph<br/>Dung Saprotroph-<br/>Endophyte-Litter<br/>Saprotroph-Undefined<br/>Saprotroph<br/>Dung Saprotroph-<br/>Ectomycorrhizal-Litter<br/>Saprotroph-Undefined<br/>Saprotroph<br/>Endophyte-Undefined<br/>Saprotroph</b> | 54  | 2.9  |
|                            |     |      |                                                                                                                                                                                                                                                                                                                                                                 | 8   | 0.4  |
|                            |     |      |                                                                                                                                                                                                                                                                                                                                                                 | 3   | 0.2  |
|                            |     |      |                                                                                                                                                                                                                                                                                                                                                                 | 2   | 0.1  |
|                            |     |      |                                                                                                                                                                                                                                                                                                                                                                 | 1   | 0.1  |
| Symbiotroph                | 12  | 0.65 | Epiphyte                                                                                                                                                                                                                                                                                                                                                        | 5   | 0.3  |
|                            |     |      | Arbuscular Mycorrhizal                                                                                                                                                                                                                                                                                                                                          | 3   | 0.2  |
|                            |     |      | Ectomycorrhizal                                                                                                                                                                                                                                                                                                                                                 | 3   | 0.2  |
|                            |     |      | <b>Endophyte</b>                                                                                                                                                                                                                                                                                                                                                | 1   | 0.1  |
| Total                      | 942 | 50.7 |                                                                                                                                                                                                                                                                                                                                                                 | 942 | 50.7 |
